# Supplementary material for: Identification of binding sites and favorable ligand binding moieties by virtual screening and self-organizing map analysis
Source: PubMed Central journal article supplement (PMC4381396; doi:10.1186/s12859-015-0518-z), 2015-03-21

Identification of binding sites and favorable ligand binding  
moieties by virtual screening and Self-Organizing Map  
analysis

Emna Harigua-Souiai, Isidro Cortes-Ciriano, Nathan Desdouits, Thérèse E. Malliavin,  
Ikram Guizani, Michael Nilges, Arnaud Blondel, Guillaume Bouvier\*

February 5, 2015

**Additional Tables**

| Target | PDB entry | Cav number | Cav ids                |
|--------|-----------|------------|------------------------|
| pa2ga  | 1kvo      | 8          | 1 2 3 5 14 15 16 19 30 |
| hmdh   | 3ccw      | 6          | 3 6 9 12 13 15         |
| braf   | 3d4q      | 5          | 2 3 4 5 6              |
| reni   | 3g6z      | 4          | 1 3 7 8                |
| prgr   | 3kba      | 4          | 1 2 3 4                |
| pgh2   | 3ln1      | 4          | 6 7 11 13              |
| glcm   | 2v3f      | 4          | 2 6 7 11               |
| esr2   | 2fsz      | 4          | 3 8 9 11               |
| dpp4   | 2i78      | 4          | 15 17 20 24            |
| cxcr4  | 3odu      | 4          | 3 4 6 9                |
| cp3a4  | 3nxu      | 4          | 1 2 3 5                |
| mk01   | 2ojg      | 3          | 2 4 5                  |
| kpcb   | 2i0e      | 3          | 1 10 11                |
| kith   | 2b8t      | 3          | 1 8 9                  |
| hivrt  | 3lan      | 3          | 2 3 6                  |
| esr1   | 1sj0      | 3          | 1 4 5                  |
| drd3   | 3pbl      | 3          | 1 4 5                  |
| cp2c9  | 1r9o      | 3          | 3 5 6                  |
| aofb   | 1s3b      | 3          | 2 5 11                 |
| adrb1  | 2vt4      | 3          | 1 6 9                  |
| aces   | 1e66      | 3          | 2 3 7                  |
| vgfr2  | 2p2i      | 2          | 1 2                    |
| thrb   | 1ype      | 2          | 2 3                    |
| thb    | 1q4x      | 2          | 1 2                    |
| tgfr1  | 3hmm      | 2          | 1 2                    |
| src    | 3e18      | 2          | 5 6                    |
| sahh   | 1li4      | 2          | 6 8                    |
| pyrd   | 1d3g      | 2          | 10 11                  |
| pygm   | 1c8k      | 2          | 6 8                    |
| pparg  | 2gtk      | 2          | 3 5                    |
| ppard  | 2znp      | 2          | 1 10                   |
| ppara  | 2p54      | 2          | 1 2                    |
| pgh1   | 2oyu      | 2          | 2 3                    |
| parp1  | 3l3m      | 2          | 3 4                    |
| nram   | 1b9v      | 2          | 1 3                    |
| mcr    | 2aa2      | 2          | 2 3                    |
| lck    | 2of2      | 2          | 3 6                    |
| jak2   | 3lpb      | 2          | 4 5                    |
| inha   | 2h7l      | 2          | 1 6                    |
| gria2  | 3kgc      | 2          | 1 2                    |
| gcr    | 3bqd      | 2          | 1 3                    |
| fgfr1  | 3c4f      | 2          | 3 4                    |
| dhi1   | 3frj      | 2          | 2 5                    |
| bace1  | 3l5d      | 2          | 1 2                    |
| andr   | 2am9      | 2          | 5 6                    |
| ampc   | 1l2s      | 2          | 3 5                    |
| adrb2  | 3ny8      | 2          | 1 2                    |
| ace    | 3bkl      | 2          | 1 3                    |
| abl1   | 2hzi      | 2          | 1 6                    |

Table S1 DUD-E targets sub-domains containing at least two cavities (detected with mkggrid) with a volume superior to 100 Å<sup>3</sup>. The last column contains the labels obtained with mkggrid for the detected cavities.

|                                  |                                  |                                  |              |              |       |       |              |              |
|----------------------------------|----------------------------------|----------------------------------|--------------|--------------|-------|-------|--------------|--------------|
| HIV-RT                           | Cavity label                     | 1                                | 2            | 3            | 4     | 5     | 6            |              |
|                                  | Cavity volume ( $\text{\AA}^3$ ) | 15.4                             | <b>338.5</b> | <b>957.4</b> | 83.8  | 34.8  | 294.9        |              |
|                                  | Neuron density (ADvina)          | 0.260                            | <b>3.070</b> | <b>0.976</b> | 0.0   | 0.0   | 0.058        |              |
|                                  | Neuron density (Dock)            | 0.0                              | <b>2.065</b> | <b>0.251</b> | 0.465 | 0.0   | 0.0          |              |
|                                  | Cavity label                     | 7                                | 8            | 9            |       |       |              |              |
|                                  | Cavity volume ( $\text{\AA}^3$ ) | 15.4                             | 15.4         | 15.4         |       |       |              |              |
|                                  | Neuron density (ADvina)          | 1.494                            | 1.494        | 0.0          |       |       |              |              |
|                                  | Neuron density (Dock)            | 0.0                              | 0.0          | 0.0          |       |       |              |              |
|                                  | ABL1                             | Cavity label                     | 1'           | 2'           | 3'    | 4'    | 5'           | 6'           |
|                                  |                                  | Cavity volume ( $\text{\AA}^3$ ) | <b>257.1</b> | 15.4         | 52.8  | 46.8  | 15.1         | <b>615.5</b> |
| Neuron density (ADvina)          |                                  | <b>3.940</b>                     | 0.0          | 0.0          | 0.043 | 0.861 | <b>2.600</b> |              |
| Neuron density (Dock)            |                                  | <b>6.410</b>                     | 0.0          | 0.0          | 0.0   | 0.0   | <b>0.0</b>   |              |
| Cavity label                     |                                  | 7'                               | 8'           | 9'           | 10'   | 11'   | 12'          |              |
| Cavity volume ( $\text{\AA}^3$ ) |                                  | 79.6                             | 15.1         | 22.1         | 46.6  | 89.5  | 37.6         |              |
| Neuron density (ADvina)          |                                  | 0.0                              | 0.0          | 0.0          | 0.0   | 0.0   | 0.0          |              |
| Neuron density (Dock)            |                                  | 0.0                              | 0.0          | 0.0          | 0.0   | 0.0   | 0.0          |              |

**Table S2** Cavities detected by mgrid on HIV-RT and ABL1. Their label, volume and neuron density (neuron/ $\text{\AA}^3$ ) were calculated with the SOMs obtained with the EGF library. Cavities corresponding to AS and BS2 are in bold for each target.

| Method       | Set size | Success rate (SR) |      |
|--------------|----------|-------------------|------|
|              |          | Top3              | Top1 |
| SOM-BSfinder | 102      | 99%               | 90%  |
| FTsite       | 48       | 98%               | 94%  |
|              | 35       | 97%               | 97%  |
| Q-siteFinder | 134      | 86%               | 80%  |
| SiteHound    | 77       | 95%               | 77%  |
| AutoLigand   | 187      | –                 | 73%  |

**Table S3** Success rates for SOM-BSfinder and other energy-based algorithms when precision threshold is set to zero. These results are consistent with those obtained with various precision thresholds. SOM-BSfinder outperformed Q-siteFinder, SiteHound and AutoLigand, but presented lower success rates compared to FTSite.

| Target | SOM-BSfinder | SiteHound | FTSite |
|--------|--------------|-----------|--------|
| HIV-RT | 1            | 3         | 1      |
| ABL1   | 2            | 2         | 3      |
| REN1   | 1            | 2         | 1,2,3  |
| BRAF   | 1            | 2,3       | 1      |
| HMDH   | 1            | 6         | 1,2    |
| PA2GA  | 1            | 1,2       | 1,2    |

**Table S4** Active Site rank calculated for 6 targets in the DUD-E, chosen in different categories (table 1), using SOM-BSfinder, SiteHound and FTSite. With ABL1, SOM-BSfinder and SiteHound ranked the AS as the second position and FTSite ranked it in the third one. Otherwise, SOM-BSfinder ranked the AS as the first CC, which is not the case for FTSite and SiteHound. The latter algorithms showed more variability in the ranking.

|        | E(EGFd) | E(AS) | $E(\overline{AS})$ | $E(AS)/E(EGFd)$ | $E(AS)/E(\overline{AS})$ |
|--------|---------|-------|--------------------|-----------------|--------------------------|
| HIV-RT | 0.08    | 0.22  | 0.05               | 2.85            | 4.64                     |
| ABL1   | 0.06    | 0.18  | 0.04               | 2.87            | 4.44                     |

**Table S5** The enrichments in “active features” of the docked fragments ( $E(EGFd)$ ), the AS ( $E(AS)$ ) and the complementary of AS ( $E(\overline{AS})$ ) for the test targets HIV-RT and ABL1.

| Target | Metric | Value | $\mu$ | $\sigma$  | Z-score |
|--------|--------|-------|-------|-----------|---------|
| HIV-RT | Se     | 0.49  | 0.17  | $10^{-2}$ | 23      |
|        | Sp     | 0.85  | 0.82  | $10^{-3}$ | 23      |
| ABL1   | Se     | 0.46  | 0.16  | $10^{-2}$ | 20      |
|        | Sp     | 0.86  | 0.84  | $10^{-3}$ | 20      |

**Table S6** Z-scores of the sensitivity (Se) and specificity (Sp) values obtained with the chemical features decomposition analysis for the test targets: HIV-RT and ABL1. For the sensitivity, we simulated a random sampling over features docking in the AS ( $F_{AS}$ ) 1 million times. In a perfect scenario, all the active features ( $F_A$ ) would dock in the AS, giving a sensitivity equal to 1. In the worst scenario, none of the active features would dock in the AS. The resulting samples were normally distributed  $N(\mu, \sigma)$ . The Z-score is the distance in terms of  $\sigma$  between the “experimental” value and the mean  $\mu$  of the normal distribution. We did the same for the sensitivity, sampling randomly over features that would never dock in the AS ( $\overline{F_{AS}}$ ).

## Additional Figures

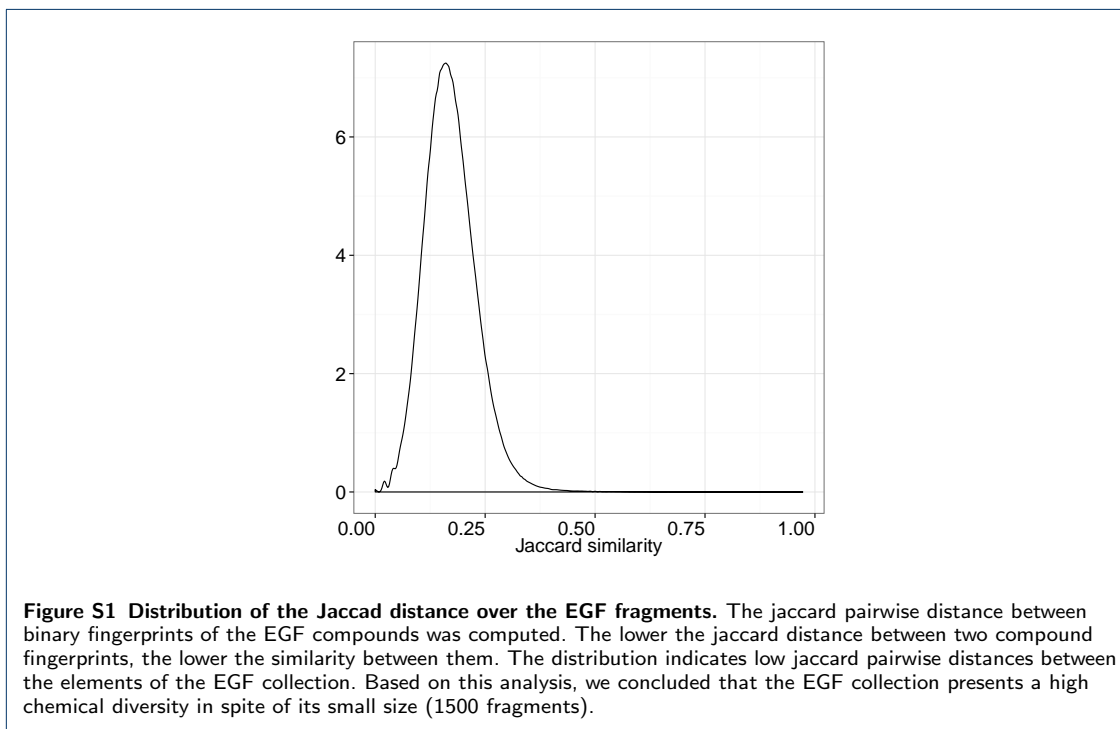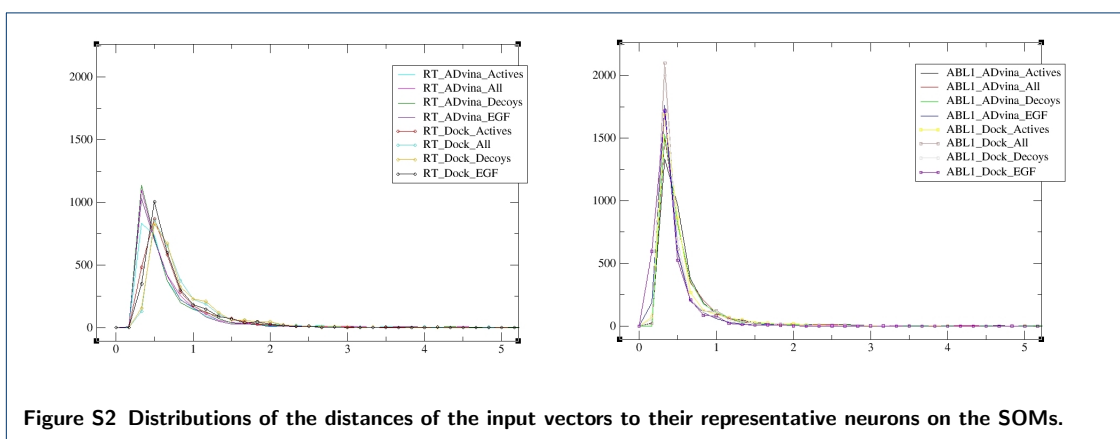

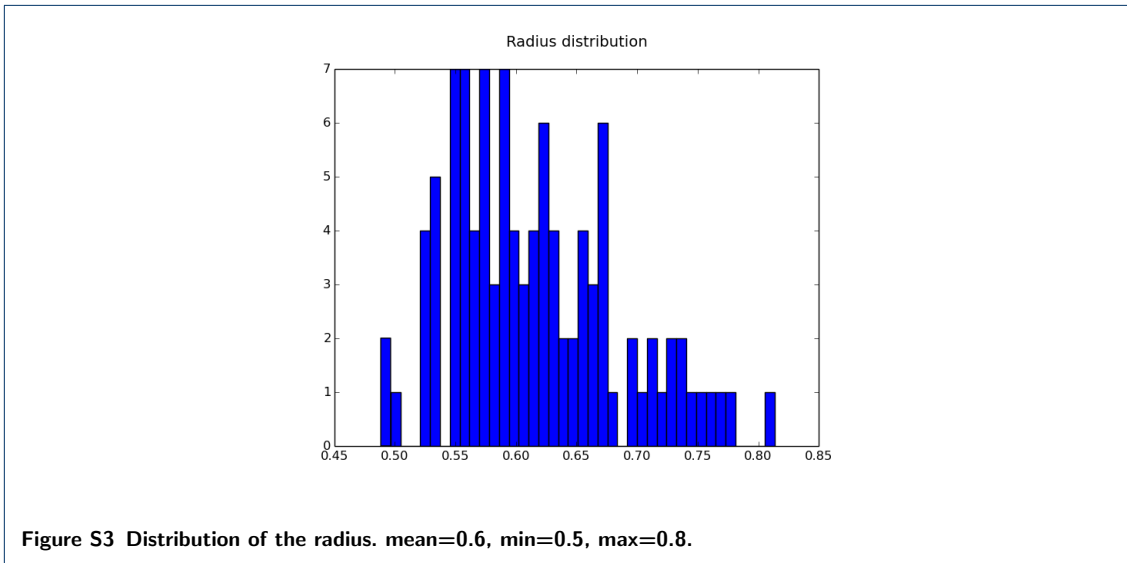

Supplement: 12859_2015_518_MOESM1_ESM.pdf [file 12859_2015_518_MOESM1_ESM.pdf]
